# Supplementary material for: Facilitating permeability of landscapes impacted by roads for protected amphibians: patterns of movement for the great crested newt
Source: PeerJ. 2017 Feb 28;5:e2922. doi: 10.7717/peerj.2922 (PMC5333553; doi:10.7717/peerj.2922)
Supplement: Table S1 [file peerj-05-2922-s001.xlsx]

## Sheet: Sheet1
Years		Age		Sex		Mitigation system (% Tunnel/Fence; Side)						Season
Triturus cristatus (Great crested newt)
	N	Adults	Juveniles	Males	Females	ACO	North	South	Fence	East	West	Spring	Summer	Autumn
2007	6	6	0	2	4	4	0	2	0	2	4	3	1	2
2008	197	53	144	14	39	7	32	59	99	64	133	42	5	150
2010	209	159	50	31	127	8	29	47	125	93	116	77	6	126
2011	41	21	20	8	13	0	15	5	21	18	23	11	17	13
2012	275	201	74	30	169	0	14	5	256	96	179	122	23	130
Total	728	440	288	85	352	19	90	118	501	273	455	255	52	421
%	100	60.44	39.56	19.45	80.54	2.61	12.36	16.20	68.82	37.5	62.5	35.03	7.14	57.82
Lissotriton vulgaris (Smooth newt)
	N	Adults	Juveniles	Males	Females	ACO	North	South	Fence	East	West	Spring	Summer	Autumn
2007	3	1	0	0	1	0	0	3	0	3	0	0	3	0
2008	36	9	27	3	6	4	13	14	5	14	22	12	3	21
2010	36	8	28	6	1	0	20	6	10	24	12	9	4	23
2011	4	0	4	0	0	0	1	0	3	0	4	0	4	0
2012	16	10	6	6	4	0	1	1	14	13	3	7	0	9
Total	95	28	65	15	12	4	35	24	32	54	41	28	14	53
%	100	29.47	68.42	55.55	44.44	4.21	36.84	25.26	33.68	56.84	43.15	29.47	14.73	55.78
