# Supplementary material for: Facilitating permeability of landscapes impacted by roads for protected amphibians: patterns of movement for the great crested newt
Source: PeerJ. 2017 Feb 28;5:e2922. doi: 10.7717/peerj.2922 (PMC5333553; doi:10.7717/peerj.2922)
Supplement: Table S2 [file peerj-05-2922-s002.xlsx]

## Sheet: Sheet1
		Seasonality		Direction
	Random effects	Variance	SD	Variance	SD
	Year (2008;2010-2012)	0.1877	0.4332	8.12e-07	9.0e-07
		total=144, year=4		total=96, year=4
